# Supplementary material
Source: publisher site journal article supplement (https://www.spandidos-publications.com/2885/downloadSupplementary)
Supplement: Supplementary file 1 [file downloadSupplementary]

## Sheet: Sheet1
Table SVI. Clinical information and SOCS2 expression of 80 HCC patients from 920th Hospital.
ID	time	status	gender	year	stage i	stage ii	stage iii or iv	SOCS2 expression_level	group
HCC-2Y-001	2.82192	0	0	23	1	0	0	31.8864	High
HCC-2Y-003	1.21644	1	0	63	0	1	0	20.2122	Low
HCC-2Y-007	0.419178	0	0	65	0	0	1	0.138396	Low
HCC-2Y-008	0.054795	1	0	52	0	0	1	38.5448	High
HCC-2Y-011	0.594521	0	0	75	0	1	0	0.162019	Low
HCC-2Y-012	2.20959	0	0	80	0	0	1	24.3462	High
HCC-2Y-013	0.819178	0	0	59	0	1	0	23.6632	High
HCC-2Y-015	0.761644	0	0	69	0	0	1	22.5628	High
HCC-2Y-022	3.2	1	0	55	0	0	1	20.1072	Low
HCC-2Y-028	1.08493	1	0	54	1	0	0	23.7996	Low
HCC-2Y-029	2.10959	1	0	20	0	0	1	17.0584	Low
HCC-2Y-031	0.745205	0	0	54	0	1	0	31.5914	High
HCC-2Y-032	4.42466	0	0	59	1	0	0	21.5936	High
HCC-2Y-035	0.863014	0	0	80	0	1	0	24.8543	High
HCC-2Y-036	3.33425	0	0	78	0	1	0	22.9259	High
HCC-2Y-037	4.08219	0	0	68	0	0	1	0.0658473	Low
HCC-2Y-039	1.09315	1	0	23	1	0	0	21.4424	Low
HCC-2Y-041	2.07397	1	0	88	1	0	0	21.4965	Low
HCC-2Y-043	4.70137	0	0	83	0	0	1	23.4225	High
HCC-2Y-044	1.77808	0	0	54	0	1	0	28.8773	High
HCC-2Y-046	4.93699	0	0	52	0	1	0	23.7123	High
HCC-2Y-047	4.91233	1	0	91	1	0	0	22.1122	Low
HCC-2Y-048	4.66849	0	0	69	1	0	0	29.6362	High
HCC-2Y-050	0.249315	0	0	60	1	0	0	23.8946	High
HCC-2Y-053	1.53973	1	0	69	0	1	0	20.0522	Low
HCC-2Y-057	1.82192	0	0	68	0	1	0	30.8362	High
HCC-2Y-065	2.29315	0	0	77	0	0	1	24.015	High
HCC-2Y-069	3.10959	0	0	55	0	0	1	22.5749	High
HCC-2Y-071	0.021918	1	0	75	1	0	0	94.6688	High
HCC-2Y-075	4.49863	0	0	57	1	0	0	23.8799	High
HCC-2Y-076	0.238356	0	0	71	1	0	0	0.0107533	Low
HCC-2Y-077	0.978082	1	0	72	1	0	0	138.484	High
HCC-2Y-078	0.265753	0	0	79	0	0	1	26.8843	High
HCC-2Y-002	0.882192	1	1	69	1	0	0	20.208	Low
HCC-2Y-004	1.49863	0	1	45	0	1	0	22.2429	High
HCC-2Y-005	1.94795	1	1	64	1	0	0	20.1196	Low
HCC-2Y-006	1.73425	0	1	61	1	0	0	0.0156957	Low
HCC-2Y-009	1.06027	1	1	56	0	0	1	135.669	High
HCC-2Y-010	0.353425	0	1	60	1	0	0	26.2828	High
HCC-2Y-014	0.353425	0	1	69	1	0	0	0.0518621	Low
HCC-2Y-016	2.71781	1	1	77	1	0	0	21.3855	Low
HCC-2Y-017	4.69041	1	1	28	1	0	0	19.8895	Low
HCC-2Y-018	4.15343	1	1	48	0	1	0	246.261	High
HCC-2Y-019	3.05479	1	1	62	1	0	0	21.5017	Low
HCC-2Y-020	1	1	1	54	1	0	0	14.553	Low
HCC-2Y-021	2.12603	1	1	62	0	1	0	20.1159	Low
HCC-2Y-023	1.6	1	1	71	1	0	0	19.8221	Low
HCC-2Y-024	4.44932	0	1	37	1	0	0	0.0110067	Low
HCC-2Y-025	2.32329	0	1	72	0	1	0	27.1767	High
HCC-2Y-026	0.843836	0	1	60	0	0	1	23.0004	High
HCC-2Y-027	0.950685	0	1	76	0	0	1	25.0879	High
HCC-2Y-030	2.79726	0	1	75	1	0	0	23.9464	High
HCC-2Y-033	1.04658	0	1	74	1	0	0	30.9197	High
HCC-2Y-034	0.684932	1	1	70	0	1	0	20.8096	Low
HCC-2Y-038	3.48219	0	1	74	0	0	1	0.386831	Low
HCC-2Y-040	2.32603	1	1	83	1	0	0	215.434	High
HCC-2Y-042	2.8274	0	1	54	1	0	0	36.2388	High
HCC-2Y-045	0.994521	1	1	73	1	0	0	168.477	High
HCC-2Y-049	0.054795	1	1	41	1	0	0	21.8608	Low
HCC-2Y-051	0.383562	0	1	67	1	0	0	1.5817	Low
HCC-2Y-052	0.09863	0	1	26	0	1	0	0.85015	Low
HCC-2Y-054	1.52055	1	1	62	1	0	0	20.2864	Low
HCC-2Y-055	2.29315	1	1	69	1	0	0	11.7339	Low
HCC-2Y-056	0.717808	0	1	68	0	1	0	0.811403	Low
HCC-2Y-058	0.279452	0	1	64	0	1	0	1.48255	Low
HCC-2Y-059	3.16712	0	1	56	0	0	1	29.1296	High
HCC-2Y-060	0.282192	0	1	61	1	0	0	0.0505446	Low
HCC-2Y-061	0.89863	1	1	72	1	0	0	20.0192	Low
HCC-2Y-062	2.83288	0	1	84	0	0	1	31.8638	High
HCC-2Y-063	1.98356	0	1	71	0	0	1	29.736	High
HCC-2Y-064	2.94247	1	1	76	1	0	0	21.2366	Low
HCC-2Y-066	1.86301	1	1	79	1	0	0	223.147	High
HCC-2Y-067	1.23014	1	1	72	1	0	0	165.437	High
HCC-2Y-068	2.27671	0	1	65	0	1	0	28.3342	High
HCC-2Y-070	4.74247	1	1	61	1	0	0	21.9543	Low
HCC-2Y-072	3.97808	1	1	51	1	0	0	182.956	High
HCC-2Y-073	0.712329	1	1	79	0	0	0	20.0531	Low
HCC-2Y-074	0.093151	0	1	69	0	1	0	0.0764252	Low
HCC-2Y-079	1.12055	1	1	65	1	0	0	20.3791	Low
HCC-2Y-080	0.830137	0	1	64	0	0	1	0	Low
